# Supplementary figures and images for: Oviductin sets the species-specificity of the mammalian zona pellucida
Source: eLife journal article supplement (doi:10.7554/elife.101338), 2024-10-31

**A**

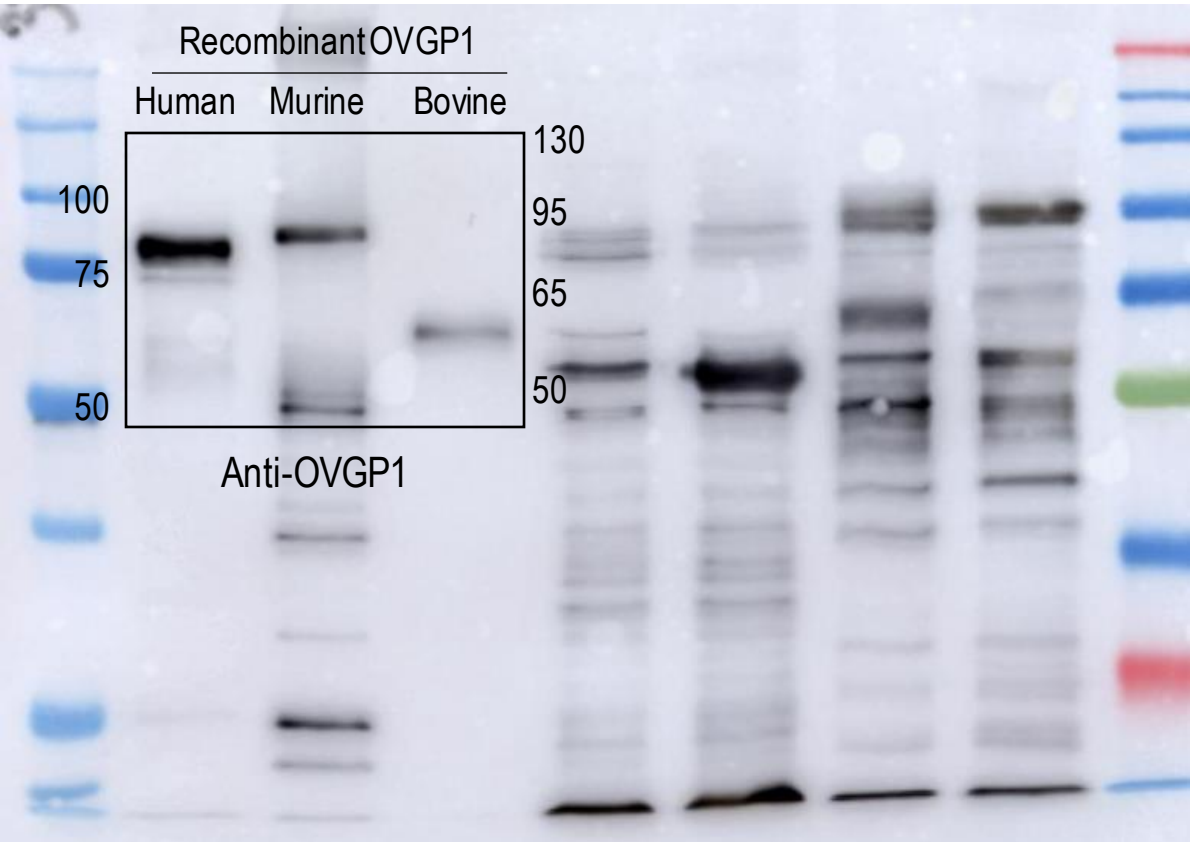

**B**

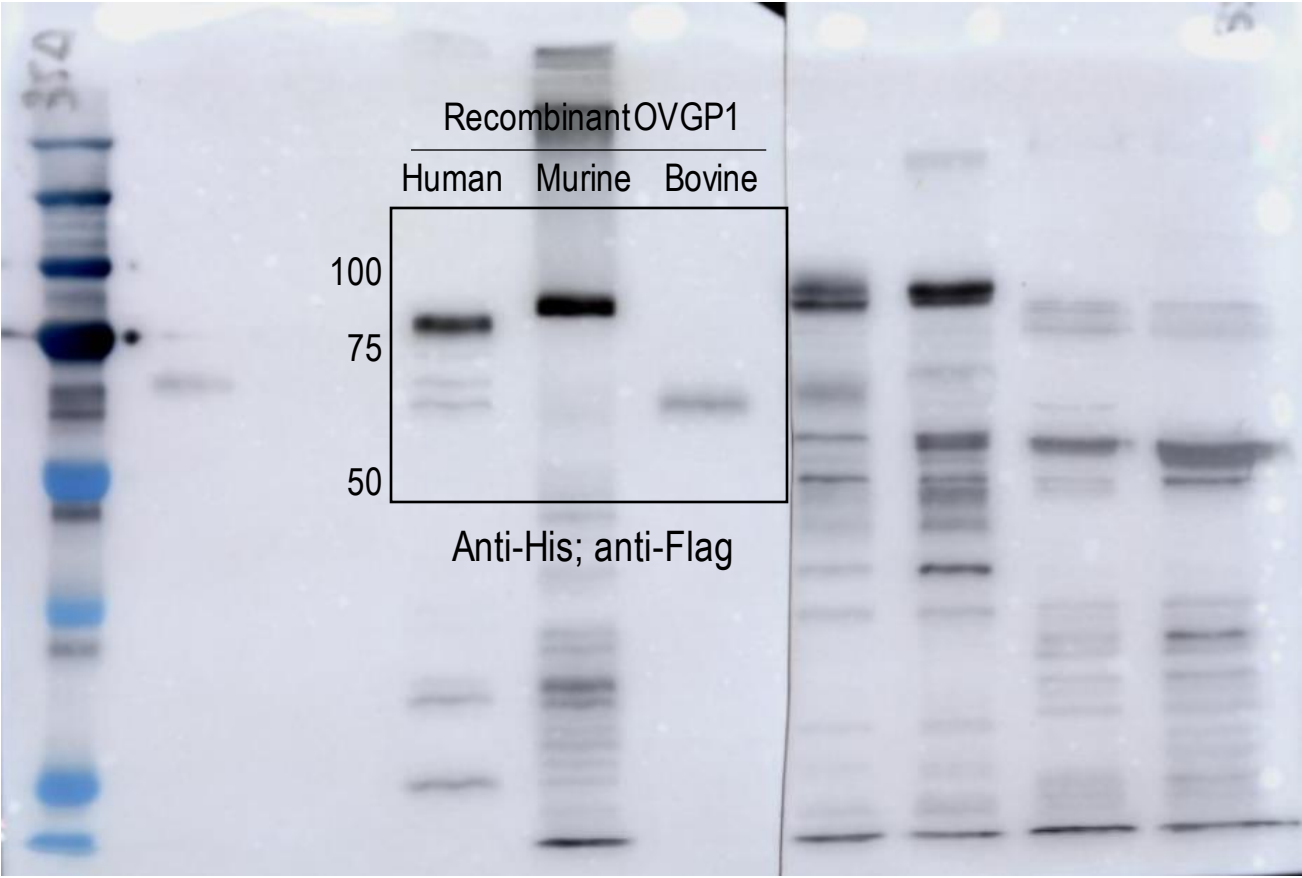

Supplement: fig4-figsupp2-data1 [file elife-101338-fig4-figsupp2-data1-v1.zip]
